# Supplementary material for: The Fecal Redox Potential in Healthy and Diarrheal Pigs and Their Correlation with Microbiota
Source: MDPI journal article supplement (doi:10.3390/antiox13010096), 2024-01-12
Supplement: s1 [file s1]

**Supplementary Table S1. Dietary composition and nutrient levels for weaned piglets**

| <b>Ingredient composition (%)</b>   | <b>Content</b> | <b>Nutrients levels (%)</b> | <b>Content</b> |
|-------------------------------------|----------------|-----------------------------|----------------|
| Puffed corn flour                   | 24.0           | Crude protein               | 18.00          |
| Broken rice noodles                 | 16.8           | Crude fibre                 | 6.00           |
| Fish meal                           | 3.0            | Ash                         | 8.00           |
| Puffing of soybean                  | 5.0            | Ca                          | 0.86           |
| Soybean oil                         | 0.65           | Digestible P                | 0.55           |
| Fermented soybean meal              | 8.0            | Lysine                      | 1.5            |
| Stone powder                        | 0.8            |                             |                |
| Calcium dihydrogen phosphate        | 0.74           |                             |                |
| Flour                               | 5.00           |                             |                |
| Sugar                               | 3.00           |                             |                |
| Glucose                             | 4.0            |                             |                |
| Milk powder                         | 10.0           |                             |                |
| Low protein whey powder             | 10.0           |                             |                |
| Soy protein concentrate             | 4.0            |                             |                |
| High nucleotide yeast hydrolysate   | 1.0            |                             |                |
| 4% Suckling pig premix <sup>1</sup> | 4.0            |                             |                |
| Total                               | 100            |                             |                |

<sup>1</sup>The premix provided the following per kg of diets: VA 11 000 IU; VD<sub>3</sub> 1 000 IU; VE 16 IU; VK 11 mg; VB<sub>1</sub> 0.6 mg; VB<sub>2</sub> 0.6 mg; VB<sub>6</sub> 1.5 mg; VB<sub>12</sub> 0.03 mg; VB<sub>4</sub> 800 mg; biotin 6 mg; nicotinic acid 10 mg; folic acid 0.8 mg; Fe 165 mg; Zn 165 mg; Cu 16.5 mg; Mn 30 mg; Co 0.15 mg; I 0.25 mg; Se 0.25 mg.

**Supplementary Table S2. Dietary composition and nutrient levels for growth and finishing pigs**

| <b>Ingredient composition (%)</b>       | <b>Growth period<sup>3</sup></b> | <b>Finishing period<sup>3</sup></b> | <b>Nutrients levels (%)</b>   | <b>Growth period</b> | <b>Finishing period</b> |
|-----------------------------------------|----------------------------------|-------------------------------------|-------------------------------|----------------------|-------------------------|
| Corn                                    | 70.0                             | 80.0                                | Digestive energy <sup>2</sup> | 14.60                | 14.20                   |
| Soybean meal                            | 18.0                             | 16.83                               | Crude protein                 | 16                   | 14                      |
| Wheat bran                              | 6.50                             | 0.00                                | Lysine                        | 1.23                 | 0.73                    |
| Soybean oil                             | 1.90                             | 0.30                                | Methionine/cystine            | 0.70                 | 0.42                    |
| Lysine                                  | 0.69                             | 0.22                                | Threonine                     | 0.79                 | 0.47                    |
| Methionine                              | 0.24                             | 0.00                                | Tryptophan                    | 0.22                 | 0.13                    |
| Threonine                               | 0.30                             | 0.05                                |                               |                      |                         |
| Tryptophan                              | 0.07                             | 0.00                                |                               |                      |                         |
| Calcium hydrogen phosphate              | 0.45                             | 0.65                                |                               |                      |                         |
| Stone powder                            | 0.5                              | 0.5                                 |                               |                      |                         |
| Salt                                    | 0.3                              | 0.3                                 |                               |                      |                         |
| Multivitamins and minerals <sup>1</sup> | 0.23                             | 0.23                                |                               |                      |                         |
| Choline chloride (50%)                  | 0.12                             | 0.12                                |                               |                      |                         |
| Zeolite powder                          | 0.6                              | 0.7                                 |                               |                      |                         |
| Antioxidant and antifungal agent        | 0.1                              | 0.1                                 |                               |                      |                         |
| Total                                   | 100.0                            | 100.0                               |                               |                      |                         |

<sup>1</sup>The multivitamins and minerals supply per kg diet as follows:VA 11 000IU, VD<sub>3</sub> 1 000 IU, VE 16 IU, VK<sub>1</sub> 1 mg, VB<sub>1</sub> 0.6 mg, VB<sub>2</sub> 0.6 mg, VB<sub>3</sub> 10 mg, VB<sub>12</sub> 0.03 mg, VB<sub>9</sub> 0.8 mg, VB<sub>6</sub> 1.5 mg, Fe 165 mg, Zn 165 mg, Cu 16.5 mg, Mn 30 mg, Co 0.15 mg, I 0.25 mg, Se 0.26 mg. <sup>2</sup>The unit of digestive energy is MJ/kg.

<sup>3</sup>Growth period 85-105 days of age, finishing period 105-162 days of age.
